# Supplementary material
Source: MDPI journal article supplement (https://www.mdpi.com/2073-4395/12/10/2341)
Supplement: s1 [file s1]

## **Online Resource**

# **Agronomic Efficiency of Phosphorus Fertilisers Recovered from Milk Processing Waste**

**Shane McIntosh \*, Terry Rose, Andrew Rose, Lee Kearney and Dirk Erler**

Faculty of Science and Engineering, Southern Cross University, Lismore, NSW 2480, Australia

\* Correspondence: [shane.mcintosh@scu.edu.au](mailto:shane.mcintosh@scu.edu.au); Tel.: +61-40-840-0194

**Supplementary Table S1.** Product distribution following pyrolysis of MFS as a function of various temperature settings.

| Pyrolysis temperature | Pyrolysis distribution products |                    |                     |
|-----------------------|---------------------------------|--------------------|---------------------|
|                       | Biochar                         | Condensable liquid | Non-condensable gas |
| 450°C                 | 23.57 (0.73)                    | 69.73 (2.22)       | 6.70 (1.76)         |
| 550°C                 | 21.39 (0.69)                    | 64.71 (0.49)       | 13.89 (1.18)        |
| 650°C                 | 21.04 (0.67)                    | 66.35 (1.50)       | 13.56 (0.83)        |

SEM is presented in parenthesis (n = 4)

**Supplementary Table S2.** Recovery yields of elements in biochars produced at varying temperatures.

| Element    | Recovery yields (%) |        |        |
|------------|---------------------|--------|--------|
|            | 450 °C              | 550 °C | 650 °C |
| Carbon     | 15.68               | 14.68  | 14.29  |
| Nitrogen   | 29.92               | 27.41  | 24.21  |
| Calcium    | 96.02               | 88.89  | 85.91  |
| Magnesium  | 90.53               | 87.29  | 79.10  |
| Potassium  | 90.01               | 84.68  | 79.21  |
| Sodium     | 90.32               | 84.79  | 79.11  |
| Sulphur    | 10.84               | 6.10   | 5.13   |
| Phosphorus | 98.32               | 95.34  | 87.90  |
| Zinc       | 64.07               | 72.31  | 75.88  |
| Manganese  | 95.57               | 84.60  | 77.96  |
| Iron       | 68.22               | 79.98  | 72.43  |
| Copper     | 63.29               | 43.15  | 32.61  |
| Boron      | 22.67               | 20.98  | 20.26  |
| Silicon    | 23.31               | 22.62  | 29.06  |
| Aluminium  | 91.82               | 85.88  | 78.51  |

Recovery based on composition of starting material

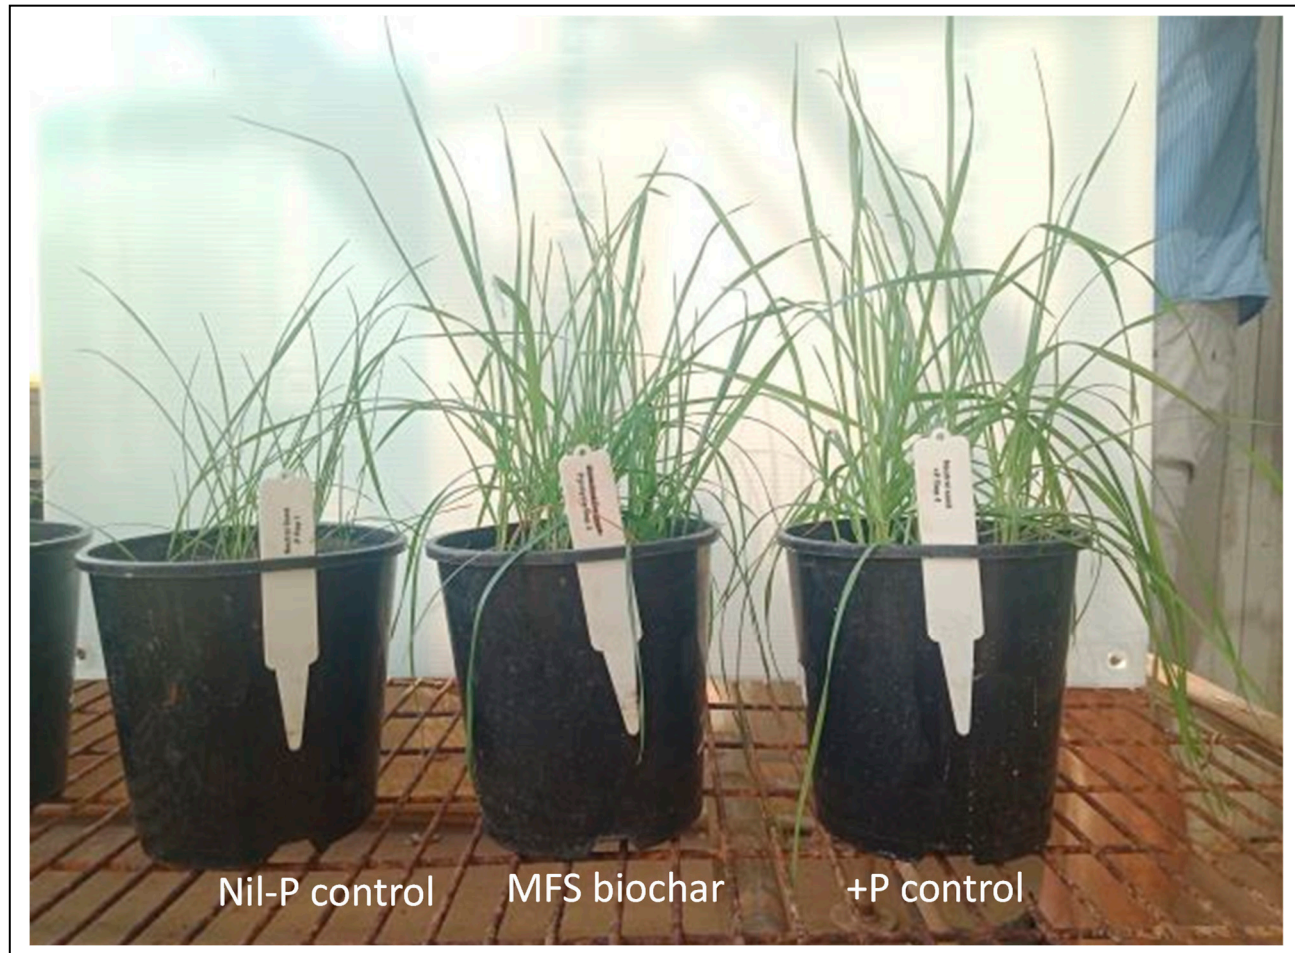

**Supplementary Figure S1.** Medium term P-limiting bioassay with ryegrass in Arenosol soil, a) nil P control, b) + MFS biochar and c) + P control ( $K_2HPO_4$ ).
